# Supplementary material for: Risk and Clinical Significance of Idiopathic Preterm Birth in Microvillus Inclusion Disease
Source: MDPI journal article supplement (doi:10.3390/jcm10173935), 2021-08-31
Supplement: s1 [file s1]

Supplementary Table 1. List of all cases of MVID with reported gestational age and clinical data. For legend see box at the end of the table.

|          | GA (week) | spont | birt | seks (1: m) | BW (g) | BW%   | PH (1: yes) | antenatal | onset (d) | stool (mg/ LD) | 1: yes, RD | 1: yes | TPN (1: yes) | TPN | wean | dead (1: y) | last follow | Mutation | MYO5B          | mutation (f, m) |                 |
|----------|-----------|-------|------|-------------|--------|-------|-------------|-----------|-----------|----------------|------------|--------|--------------|-----|------|-------------|-------------|----------|----------------|-----------------|-----------------|
| 28842815 | 38        | 1     | 1    | 1           | 3500   | 78.21 | nr          | 2         | 3         | nr             | 1          | nr     | 1            | 2   | 1    | 1           | mo          | nr       |                |                 |                 |
| 28842815 | 34        | 1     | 2    | 2           | 2000   | 40.02 | nr          | 2         | 5         | nr             | 1          | nr     | 1            | 2   | 1    | 1           | mo          | no       | MYO5B          |                 |                 |
| 29546954 | 36        | 2     | 1    | nr          | nr     |       | 2           | 2         | 10        | 150            | 1          | 1      | 1            | 2   | 2    | 36          | mo          | nr       |                |                 |                 |
| 23525737 | AT        | nr    | 1    | nr          |        |       | 1           | 2         | 6         | 150            | 1          | nr     | 1            | 2   | 2    | 168         | mo          | nr       |                |                 |                 |
| 23354788 | 35        | 2     | 2    | 2           | 2330   | 50.15 | 1           | 1         | 1         | nr             | 1          | 1      | 1            | 2   | 1    | 7           | mo          | MYO5B    | nr             | nr              |                 |
| 23226823 | AT        | 1     | 2    | nr          |        |       | 2           | 1         | 3         | nr             | 1          | nr     | 1            | 2   | 1    | 1           | mo          | nr       |                |                 |                 |
| 22318102 | 35        | 1     | 2    | 2           | 2320   | 49.13 | 1           | 1         | 3         | nr             | nr         | nr     | 1            | 2   | 1    | 1           | mo          | nr       |                |                 |                 |
| 22197941 | 37        | 1     | 2    | 2           | 2900   | 59.46 | 1           | 2         | 1         | 100            | nr         | nr     | 1            | 2   | 2    | 0           | mo          |          |                |                 |                 |
| 22152886 | 35        | 1     | 1    | nr          | nr     | nr    | nr          | nr        | 4         | nr             | 1          | nr     | 1            | 2   | 2    | 41          | mo          |          |                |                 |                 |
| 21968248 | AT        | 1     | 1    | 1           | 2734   |       | 2           | 2         | 3         | 175            | 1          | nr     | 1            | 2   | 2    | 3           | mo          | nr       |                |                 |                 |
| 21299349 | 35        | 1     | 1    | nr          | nr     | nr    | 2           | 2         | 3         | nr             | 1          | 1      | 1            | 2   | 1    | 2           | mo          | nr       |                |                 |                 |
| 18277898 | 34        | 1     | 1    | 1           | 2450   | 73.00 | 2           | 2         | nr        | nr             | 2          | 1      | 2            | 2   | 2    | 12          | d           |          |                |                 |                 |
| 17418172 | 31        | 1     | 1    | 1           | 1710   | 68.85 | nr          | nr        | 3         | 100            | 1          | nr     | 1            | 2   | 2    | 12          | d           |          |                |                 |                 |
| 15456973 | 37        | 1     | 2    | 2           | 2530   | 24.52 | nr          | 2         | 1         | 200            | nr         | nr     | nr           | 1   | 2    | 1           | 1.5         | mo       |                |                 |                 |
| 11783915 | AT        | 1     | 1    | 1           | nr     | nr    | nr          | 2         | 6         | 115            | nr         | nr     | nr           | 1   | 2    | 2           | 5           | mo       | MYO5B          | p.P660L         |                 |
| 11414303 | 36        | 1     | 1    | 1           | 2700   | 50.98 | 2           | 2         | 2         | 200            | nr         | nr     | nr           | 1   | 2    | 2           | 4           | mo       | pre 2008       |                 |                 |
| 11251929 | 35        | 2     | 1    | 1           | 3720   | 99.46 | 1           | 1         | nr        | 300            | nr         | nr     | nr           | 1   | 2    | 2           | 3           | d        | pre 2008       |                 |                 |
| 11173328 | 36        | 1     | 1    | 1           | 2740   | 54.78 | 2           | 2         | 3         | nr             | nr         | nr     | nr           | 1   | 2    | 1           | 6           | mo       | pre 2008       |                 |                 |
| 10941974 | AT        | 1     | 2    | 2           | 3510   | nr    | nr          | 2         | 11        | nr             | nr         | nr     | nr           | 1   | 1    | 2           | 39          | mo       | pre 2008       |                 |                 |
| 10941971 | 34        | 1     | 2    | 2           | 2100   | 50.76 | 2           | 1         | 6         | 175            | nr         | nr     | nr           | 1   | 2    | 2           | 24          | mo       | pre 2008       |                 |                 |
| 9932857  | 36        | 2     | 2    | 2           | nr     | nr    | nr          | 2         | 10        | 170            | nr         | nr     | nr           | 1   | 2    | 2           | 9           | mo       | pre 2008       |                 |                 |
| 9880458  | 39        | nr    | 1    | 1           | 3500   | 63.85 | nr          | 2         | 6         | 95             | nr         | nr     | nr           | 1   | 2    | 2           | 24          | mo       | pre 2008       |                 |                 |
| 9880458  | 38        | nr    | 1    | 1           | 2600   | 7.45  | nr          | 2         | 6         | 125            | nr         | nr     | nr           | 1   | 2    | 2           | 96          | mo       | pre 2008       |                 |                 |
| 9880458  | 36        | nr    | 1    | 1           | 3300   | 90.81 | nr          | 2         | 6         | 150            | nr         | nr     | nr           | 1   | 2    | 2           | 84          | mo       | pre 2008       |                 |                 |
| 9880458  | 39        | nr    | 2    | 2           | 3160   | 45.90 | nr          | 2         | 4         | 175            | nr         | nr     | nr           | 1   | 2    | 2           | 48          | mo       | pre 2008       |                 |                 |
| 9880458  | 37        | nr    | 2    | 2           | 2700   | 40.24 | nr          | 2         | 4         | 100            | nr         | nr     | nr           | 1   | 2    | 1           | 36          | mo       | pre 2008       |                 |                 |
| 9844114  | 38        | 1     | 1    | 1           | 3300   | 63.28 | 2           | 2         | 1         | 75             | nr         | nr     | nr           | 1   | 2    | 2           | 132         | mo       | pre 2008       |                 |                 |
| 9822319  | 36        | 1     | 1    | 1           | 3090   | 81.64 | 2           | 2         | 2         | 100            | 1          | 1      | 1            | 2   | 2    | 3           | mo          | pre 2008 |                |                 |                 |
| 9740207  | AT        | 1     | 1    | 1           | 3900   |       | 2           | 2         | 14        | 178            | nr         | nr     | nr           | 1   | 2    | 1           | 18          | mo       | pre 2008       |                 |                 |
| 9364305  | 36        | 1     | 2    | 2           | 2700   | 40.24 | 2           | 2         | nr        | 175            | 1          | 1      | 1            | 2   | 2    | 3           | mo          | pre 2008 |                |                 |                 |
| 9323563  | 33        | 1     | 1    | 1           | 2950   | 98.57 | 1           | 1         | 1         | nr             | 1          | 1      | 1            | 2   | 1    | 7           | mo          | pre 2008 |                |                 |                 |
| 8732907  | AT        | 1     | 1    | 1           | 3350   |       | 2           | 2         | 7         | 50             | 1          | nr     | 1            | 2   | 2    | 7           | mo          | pre 2008 |                |                 |                 |
| 7959671  | AT        | 1     | 2    | 2           | 4100   |       | 2           | 2         | 14        | 60             | nr         | nr     | nr           | 1   | 2    | 1           | 39          | mo       | pre 2008       |                 |                 |
| 7959671  | AT        | 1     | 1    | 1           | 4200   |       | 2           | 2         | 14        | 50             | nr         | nr     | nr           | 1   | 2    | 1           | 5           | mo       | pre 2008       |                 |                 |
| 7959671  | AT        | 1     | 1    | 1           | 3800   |       | 2           | 2         | 7         | nr             | nr         | nr     | nr           | 1   | 2    | 2           | 58          | mo       | pre 2008       |                 |                 |
| 8067796  | 38        | 1     | 1    | 1           | 3325   | 99.97 | 2           | 2         | 1         | 166            | nr         | 1      | 1            | 2   | 1    | 9           | d           | pre 2008 |                |                 |                 |
| 8067796  | 35        | 1     | 1    | 1           | 2880   | 84.01 | 2           | 2         | 2         | 200            |            |        |              | 1   | 2    | 1           | 4           | mo       | pre 2008       |                 |                 |
| 8032396  | 35        | 1     | 2    | 2           | 2810   | 86.72 | 2           | nr        | 3         | 120            |            |        |              | 1   | 2    | 2           | 7           | mo       | pre 2008       |                 |                 |
| 1319670  | 37        | nr    | 2    | 2           | 2700   | 40.24 | 2           | 2         | 4         | 200            | nr         | nr     | nr           | 1   | 2    | 1           | 37          | mo       | pre 2008       |                 |                 |
| 1660676  | AT        | nr    | 1    | 1           | 3530   |       | 1           | nr        | 1         | 150            | nr         | nr     | nr           | 1   | 2    | 1           | 72          | mo       | pre 2008       |                 |                 |
| 1660676  | 37        | nr    | 1    | 1           | 3300   | 79.66 | 1           | nr        | 1         | 150            | nr         | nr     | nr           | 1   | 2    | 2           | 9           | mo       | pre 2008       |                 |                 |
| 2759484  | AT        | 1     | 2    | 2           | 2300   |       | 2           | 2         | 3         | 85             | nr         | nr     | nr           | 1   | 2    | 2           | 13          | mo       | pre 2008       |                 |                 |
| 3977385  | 37        | 1     | 2    | 2           | 2500   | 22.04 | 2           | 2         | 2         | nr             | nr         | nr     | nr           | 1   | 2    | 1           | 6           | mo       | pre 2008       |                 |                 |
| 3977385  | 34        | 1     | 2    | 2           | 2200   | 60.96 | 2           | 2         | 4         | nr             |            |        |              | 1   | 2    | 1           | 6           | mo       | pre 2008       |                 |                 |
| 25635218 | 36        | 1     | 2    | 2           | 2800   | 70.98 | 2           | 2         | 1         | 120            | 1          | 1      | 1            | 2   | 1    | 9           | mo          | MYO5B    | nr             |                 |                 |
| 31559144 | 35        | 1     | 2    | 2           | 2445   | 61.37 | 2           | 2         | 1         | nr             | 1          | 1      | 1            | 2   | 2    | 1           | mo          | MYO5B    | lle488Leufs*93 | lle488Leufs*93  |                 |
| 30564347 | 36        | 2     | 1    | 1           | 2820   |       | nr          | nr        | 1         | nr             |            |        |              | 1   | 2    | 1           | 3           | mo       | MYO5B          | p.Arg900Serfs*4 | N456S           |
| 30564347 | 37        | 2     | 1    | 1           | 3280   | 78.44 | 1           | nr        | 1         | nr             | nr         | nr     | nr           | 1   | 2    | 1           | 7           | mo       | MYO5B          | p.K169G         | p.K169G         |
| 30364420 | 35        | 1     | 1    | 1           | 3030   | 90.43 | 2           | nr        | 5         | nr             | 1          | 1      | 1            | 2   | 1    | 3           | mo          | MYO5B    | nr             | nr              |                 |
| 29282386 | AT        | 1     | 1    | 1           | nr     |       | 2           | nr        | 3         | nr             | nr         | nr     | nr           | 1   | 2    | 2           | 1           | mo       | STX3           |                 |                 |
| 28707991 | AT        | 2     | 1    | 1           | 3300   |       | 2           | 2         | 2         | nr             | nr         | nr     | nr           | 1   | 2    | 2           | 5           | mo       | nr             |                 |                 |
| 25111220 | 36        | nr    | 2    | 2           | 2950   | 99.86 | 2           | nr        | 2         | nr             | 1          |        |              | 1   | 2    | 2           | 36          | mo       | MYO5B          | c2259-2262dup   | c3163-3165dup   |
| 25111220 | AT        | nr    | 1    | 1           | 3290   |       | 2           | 2         | 7         | nr             | 1          | nr     | 1            | 2   | 2    | 24          | mo          | MYO5B    | c1222A>T       | c1582C>T        |                 |
| 25111220 | AT        | nr    | 1    | 1           | 3570   |       | 1           | nr        | 42        | nr             | 1          | nr     | 1            | 1   | 2    | 12          | mo          | MYO5B    | c1222A>T       | c1582C>T        |                 |
| 25111220 | AT        | nr    | 1    | 1           | 3360   |       | 2           | nr        | 5         | nr             | nr         | nr     | nr           | 1   | 1    | 2           | 144         | mo       | no MYO5B       |                 |                 |
| 25111220 | 40        | nr    | 1    | 1           | 2380   | 0.07  | 2           | 1         | (IUGR)    | nr             | nr         | nr     | nr           | 1   | 2    | 2           | 156         | mo       | no MYO5B       |                 |                 |
| 25111220 | 31        | nr    | 1    | 1           | 1645   | 61.67 | nr          | nr        | nr        | 420            | nr         |        |              |     |      | 2           | 288         | mo       | MYO5B          | c656G>A         | c4028T>C        |
| 23608388 | 36        | nr    | 1    | 1           | 3355   | 92.46 | 2           | 2         | 1         | nr             | 1          | 1      | 1            | 1   | 2    | 1           | 5           | mo       | MYO5B          | p.Q149 * (f)    | p.Q149 * (m)    |
| 22441677 | AT        | nr    | 1    | 1           | nr     |       | nr          | nr        | nr        | 1              | nr         | nr     | nr           | 1   | 2    | 2           | 60          | mo       | MYO5B          | p.Gln1456 * (f) | p.Gln1456 * (m) |
| 22152886 | 37        | nr    | 1    | 1           | nr     |       | nr          | nr        | nr        | 1              | nr         | nr     | nr           | 1   | 2    | 2           | 48          | mo       | nr             |                 |                 |
| 22152886 | 37        | nr    | 1    | 1           | nr     |       | nr          | nr        | nr        | 3              | nr         | 1      | nr           | 1   | 2    | 2           | 48          | mo       | nr             |                 |                 |
| 22030065 | 23        | 2     | 2    | 2           | 634    |       | 2           | 2         | nr        | nr             |            |        |              |     |      | 1           | 6           | mo       | MYO5B          | p.Q149 *        | p.Q341 *        |
| 21199752 | 36        | 1     | 1    | 1           | 3355   | 92.46 | 1           | 1         | 1         | nr             |            |        | 1            | 1   | 2    | 1           | 6           | mo       | MYO5B          | p.Q149 * (f)    | p.Q341 * (m)    |
| 16454574 | 35        | 1     | 1    | 1           | nr     |       | 2           | 2         | 1         | nr             |            |        |              | 1   | 2    | 2           | 1.5         | mo       | pre 2008       |                 |                 |
| 12028658 | 35        | nr    | 2    | 2           | 2110   | 27.97 | nr          | nr        | nr        | 1              | nr         |        |              |     | 1    | 2           | 4           | o        | pre 2008       |                 |                 |
| 11208062 | AT        | 1     | 2    | 2           | nr     |       | 2           | nr        | nr        | nr             | nr         | nr     | nr           |     |      | 2           | 36          | mo       | pre 2008       |                 |                 |
| 10484813 | 36        | 1     | 1    | 1           | 2805   | 60.74 | 2           | 2         | 1         | nr             |            |        |              |     |      | 1           | 37          | mo       | pre 2008       |                 |                 |
| 10484813 | 37        | 1     | 1    | 1           | 3308   | 80.14 | 2           | 2         | 2         | nr             | nr         | nr     | nr           |     |      | 2           | 132         | mo       | pre 2008       |                 |                 |
| 10484813 | 35        | 1     | 2    | 2           | 2922   | 91.06 | 2           | 2         | 2         | nr             |            |        |              |     |      | 1           | 7           | mo       | pre 2008       |                 |                 |
| 10484813 | 34        | 1     | 1    | 1           | 2558   | 80.48 | 2           | 2         | 2         | nr             |            |        |              |     |      | 1           | 4           | mo       | pre 2008       |                 |                 |
| 9364305  | 39        | 1     | 1    | 1           | 3000   | 19.22 | 2           | 2         | 3         | nr             | 1          | nr     | 1            | 2   | 2    | 8           | mo          | pre 2008 |                |                 |                 |
| 9142307  | AT        | 1     | 1    | 1           | 3570   |       | 2           | 2         | 2         | nr             | nr         | nr     | nr           |     |      | 1           | 29          | mo       | pre 2008       |                 |                 |
| 2891946  | 33        | nr    | 2    | 2           | 1900   | 53.70 | nr          |           | 1         | nr             |            |        |              |     |      | 1           | 11          | mo       | pre 2008       |                 |                 |
| 2891946  | 39        | nr    | 2    | 2           | nr     |       | nr          |           | 1         | nr             | nr         | nr     | nr           |     |      | 1           | 22          | mo       | pre 2008       |                 |                 |
| 28899465 | 39        | 1     | 2    | 2           | 2850   | 18.15 | nr          |           | 2         | nr             | nr         | nr     | nr           | 1   | 2    | 2           | 6           | mo       | MYO5B          | p.R656C         | c.310+2Tdup     |
| 8119548  | AT        | nr    | 2    | 2           | 2870   |       | 2           |           | nr        | nr             | nr         | nr     | nr           |     |      | 2           | 53          | mo       | pre 2008       |                 |                 |
| 25635218 | 36        | 1     | 2    | 2           | 2800   | 70.89 | 2           | 2         | 3         | nr             | 1          | 1      | 1            | 2   | 1    | 9           | mo          | MYO5B    | nr             | nr              |                 |
| 33525641 | 36        | nr    | 2    | 2           | nr     |       | nr          | nr        | nr        | nr             | nr         | 1      | nr           | 1   | nr   | 1           | 1.5         | mo       | MYO5B          | p.I416N         | p.I416N         |
| 33525641 | PT        | nr    | 2    | 2           | nr     |       | nr          | nr        | nr        | nr             | nr         | 2      | nr           | 1   | nr   | 1           | 7           | mo       | MYO5B          | p.R656C         | p.K672 *        |
| 33525641 | 34        | nr    | 1    | 1           | nr     |       | nr          | nr        | nr        | nr             | nr         | 1      | nr           | 1   | nr   | 1           | 5           | mo       | MYO5B          | p.D492G         | p.D492G         |
| 33525641 | 35        | nr    | 2    | 2           | nr     |       | nr          | nr        | nr        | nr             | nr         | 2      | nr           | 1   | nr   | 2           | 11          | mo       | MYO5B          | p.K246 *        | p.V871Gfs * 33  |
| 33525641 | 33        | nr    | 2    | 2           | nr     |       | nr          | nr        | nr        | nr             | nr         | 1      | nr           | 1   | nr   | 1           | 6           | mo       | MYO5B          | c.1323-2A>G     | p.C1323-2A>G    |
| 33525641 | 35        | nr    | 1    | 1           | nr     |       | nr          | nr        | nr        | nr             | nr         | 1      | nr           | 1   | nr   | 1           | 7           | mo       | MYO5B          | p.I497F         | p.E574 *        |
| 33525641 | 36        | nr    |      |             |        |       |             |           |           |                |            |        |              |     |      |             |             |          |                |                 |                 |
